# Supplementary material for: Variations in SXT elements in epidemic Vibrio cholerae O1 El Tor strains in China
Source: PubMed Central journal article supplement (PMC4783696; doi:10.1038/srep22733), 2016-03-09
Supplement: srep22733-s1.pdf [file srep22733-s1.pdf]

Supplementary Information:

**Variations in SXT elements in epidemic *Vibrio cholerae* O1 El Tor strains in China**

Ruibai Wang<sup>1,3</sup>, Dong Yu<sup>2</sup>, Junjie Yue<sup>2\*</sup>, Biao Kan<sup>1,3\*</sup>





| 57              | AHV1003          | 2255            | 1944            | 1909            | 956               | 4210            | 1627            | 143             | 1605            | 2605            | Identities(%)   |                                         |                               |
|-----------------|------------------|-----------------|-----------------|-----------------|-------------------|-----------------|-----------------|-----------------|-----------------|-----------------|-----------------|-----------------------------------------|-------------------------------|
| ORF Description | ORF Description  | ORF Description | ORF Description | ORF Description | ORF Description   | ORF Description | ORF Description | ORF Description | ORF Description | ORF Description | ORF Description | <i>P. mirabilis</i><br>strain<br>HI4320 | ICEs of<br><i>V. cholerae</i> |
| 79 strB         | 81 strB          | 81 strB         | 70 strB         | 70 strB         | 70 strB           | 70 strB         | 70 strB         | 70 strB         | 70 strB         | 70 strB         | 70 strB         | —                                       | 100                           |
|                 |                  |                 |                 |                 |                   | 71 Permease     | 71 Permease     | 71 Permease     |                 |                 |                 |                                         |                               |
|                 |                  |                 |                 |                 |                   | 72 tetA         | 72 tetA         | 72 tetA         |                 |                 |                 |                                         |                               |
|                 |                  |                 |                 |                 |                   | 73 tetR         | 73 tetR         | 73 tetR         |                 |                 |                 |                                         |                               |
|                 |                  |                 |                 |                 |                   | 74 MerR         | 74 MerR         | 74 MerR         |                 |                 |                 |                                         |                               |
|                 |                  |                 |                 |                 |                   | 75 StrB         | 75 StrB         | 75 StrB         |                 |                 |                 |                                         |                               |
| 80 tnpB         | 82 tnpB          | 82 tnpB         | 71 tnpB         | 71 tnpB         | 76 tnpB           | 76 tnpB         | 76 tnpB         | 76 tnpB         | 71 tnpB         | 71 tnpB         | 71 tnpB         | —                                       | 100                           |
| 81 tetR         | 83 tetR          | 83 tetR         | 72 s015         | 72 s015         | 77 s015           | 77 s015         | 77 s015         | 77 s015         | 72 s015         | 72 s015         | 72 s015         |                                         |                               |
| 82 tetA         | 84 tetA          | 84 tetA         | 73 folR         | 73 folR         | 78 folR           | 78 folR         | 78 folR         | 78 folR         | 73 folR         | 73 folR         | 73 folR         |                                         |                               |
|                 |                  |                 | 74 s013         | 74 s013         | 79 s013           | 79 s013         | 79 s013         | 79 s013         | 74 s013         | 74 s013         | 74 s013         |                                         |                               |
|                 |                  |                 | 75 transposase  | 75 transposase  | 80 transposase    | 80 transposase  | 80 transposase  | 80 transposase  | 75 transposase  | 75 transposase  | 75 transposase  |                                         |                               |
|                 |                  |                 | 76 dhfR         | 76 dhfR         | 81 dhfR           | 81 dhfR         | 81 dhfR         | 81 dhfR         | 76 dhfR         | 76 dhfR         | 76 dhfR         |                                         |                               |
|                 |                  |                 | 77 transposase  | 77 transposase  |                   |                 |                 |                 |                 |                 |                 |                                         |                               |
|                 |                  |                 | 78 dhfR         | 78 dhfR         |                   |                 |                 |                 |                 |                 |                 |                                         |                               |
| 83 tnpB         | 85 tnpB          | 85 tnpB         | 79 tnpB         | 79 tnpB         | 82 tnpB           | 82 tnpB         | 82 tnpB         | 82 tnpB         | 77 tnpB         | 77 tnpB         | 77 tnpB         | —                                       | 100                           |
| 84 tnpA         | 86 tnpA          | 86 tnpA         | 80 tnpA         | 80 tnpA         | 83 tnpA           | 83 tnpA         | 83 tnpA         | 83 tnpA         | 78 tnpA         | 78 tnpA         | 78 tnpA         | —                                       | 99                            |
|                 | 87 mphR          |                 |                 |                 | 81 oxidoreductase | 84 RTX          | 84 CheW         |                 |                 |                 |                 |                                         |                               |
|                 | 88 mrx           |                 |                 |                 | 82 Sensory        | 85 tnpA         | 85 CheB         |                 |                 |                 |                 |                                         |                               |
|                 | 89 mphK          |                 |                 |                 | 83 arcB           |                 | 86 heatrepeat   |                 |                 |                 |                 |                                         |                               |
|                 | 90 hypothetical  |                 |                 |                 | 84 tnpA           |                 | 87 CheR         |                 |                 |                 |                 |                                         |                               |
|                 | 91 hypothetical  |                 |                 |                 |                   |                 | 88 CheY         |                 |                 |                 |                 |                                         |                               |
|                 | 92 hypothetical  |                 |                 |                 |                   |                 | 89 CheA         |                 |                 |                 |                 |                                         |                               |
|                 | 93 transposase   |                 |                 |                 |                   |                 | 90 tnpA         |                 |                 |                 |                 |                                         |                               |
| 85 tnp          | 94 tnp           | 87 tnp          | 81 tnp          | 85 tnp          | 86 tnp            | 86 tnp          | 91 tnp          | 84 tnp          | 79 tnp          | 79 tnp          | 79 tnp          | —                                       | 100                           |
| 86 UmuC         | 95 UmuC          | 88 UmuC         | 82 UmuC         | 86 UmuC         | 87 UmuC           | 87 UmuC         | 92 UmuC         | 85 UmuC         | 80 UmuC         | 80 UmuC         | 80 UmuC         | 95                                      | 100                           |
| 87 hypothetical | 96 hypothetical  | 89 hypothetical | 83 hypothetical | 87 hypothetical | 88 hypothetical   | 88 hypothetical | 93 hypothetical | 86 hypothetical | 81 hypothetical | 81 hypothetical | 81 hypothetical | 95                                      | 100                           |
| 88 hypothetical | 97 hypothetical  | 90 hypothetical | 84 hypothetical | 88 hypothetical | 89 hypothetical   | 89 hypothetical | 94 hypothetical | 87 hypothetical | 82 hypothetical | 82 hypothetical | 82 hypothetical | 95                                      | 100                           |
| 89 s003         | 98 s003          | 91 s003         | 85 s003         | 89 s003         | 90 s003           | 90 s003         | 95 s003         | 88 s003         | 83 s003         | 83 s003         | 83 s003         | 97                                      | 100                           |
| 90 s002         | 99 s002          | 92 s002         | 86 s002         | 90 s002         | 91 s002           | 91 s002         | 96 s002         | 89 s002         | 84 s002         | 84 s002         | 84 s002         | 97                                      | 100                           |
| 91 integrase    | 100 integrase    | 93 integrase    | 87 integrase    | 91 integrase    | 92 integrase      | 92 integrase    | 97 integrase    | 90 integrase    | 85 integrase    | 85 integrase    | 85 integrase    | 97                                      | 100                           |
| 92 MutL         | 101 MutL         | 94 MutL         | 88 MutL         | 92 MutL         | 93 MutL           | 93 MutL         | 98 MutL         | 91 MutL         | 86 MutL         | 86 MutL         | 86 MutL         | —                                       | 100                           |
| 93 hypothetical | 102 hypothetical | 95 hypothetical | 89 hypothetical | 93 hypothetical | 94 hypothetical   | 94 hypothetical | 99 hypothetical | 92 hypothetical | 87 hypothetical | 87 hypothetical | 87 hypothetical | 100                                     | 100                           |
